# Supplementary material for: The biological context of HIV-1 host interactions reveals subtle insights into a system hijack
Source: Springer Nature journal article supplement (doi:10.1186/1752-0509-4-80), 2010-06-07
Supplement: 12918_2009_469_MOESM1_ESM.pdf [file 12918_2009_469_MOESM1_ESM.pdf]

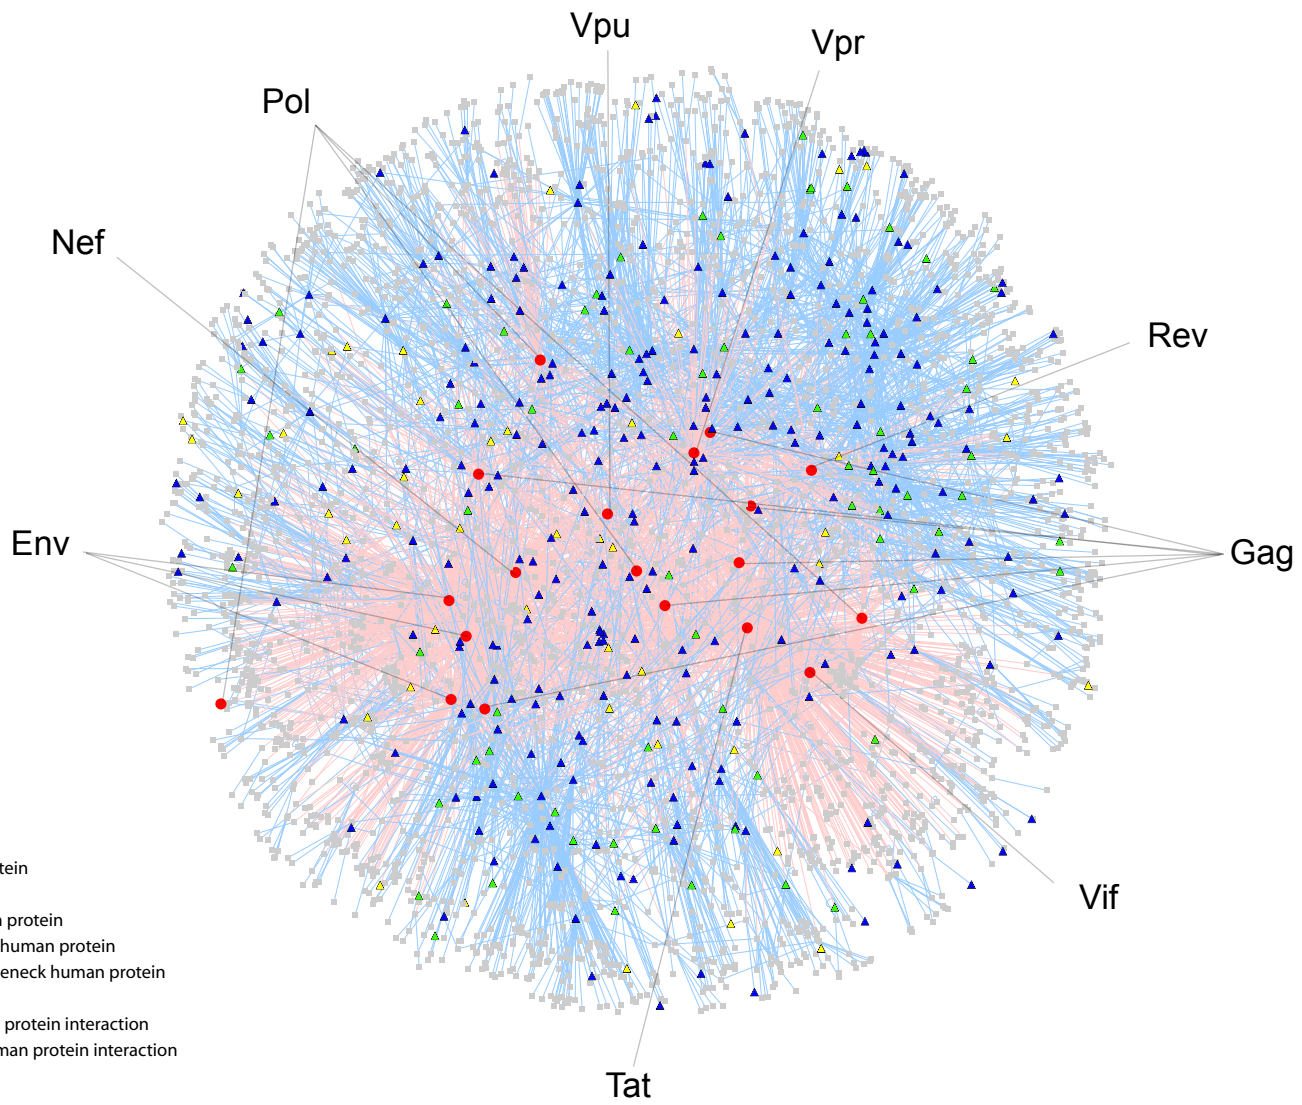

- HIV protein
- human protein
- ▲ hub human protein
- ▲ bottleneck human protein
- ▲ hub & bottleneck human protein
- HIV-human protein interaction
- human-human protein interaction
