# Supplementary material for: The biological context of HIV-1 host interactions reveals subtle insights into a system hijack
Source: Springer Nature journal article supplement (doi:10.1186/1752-0509-4-80), 2010-06-07

A

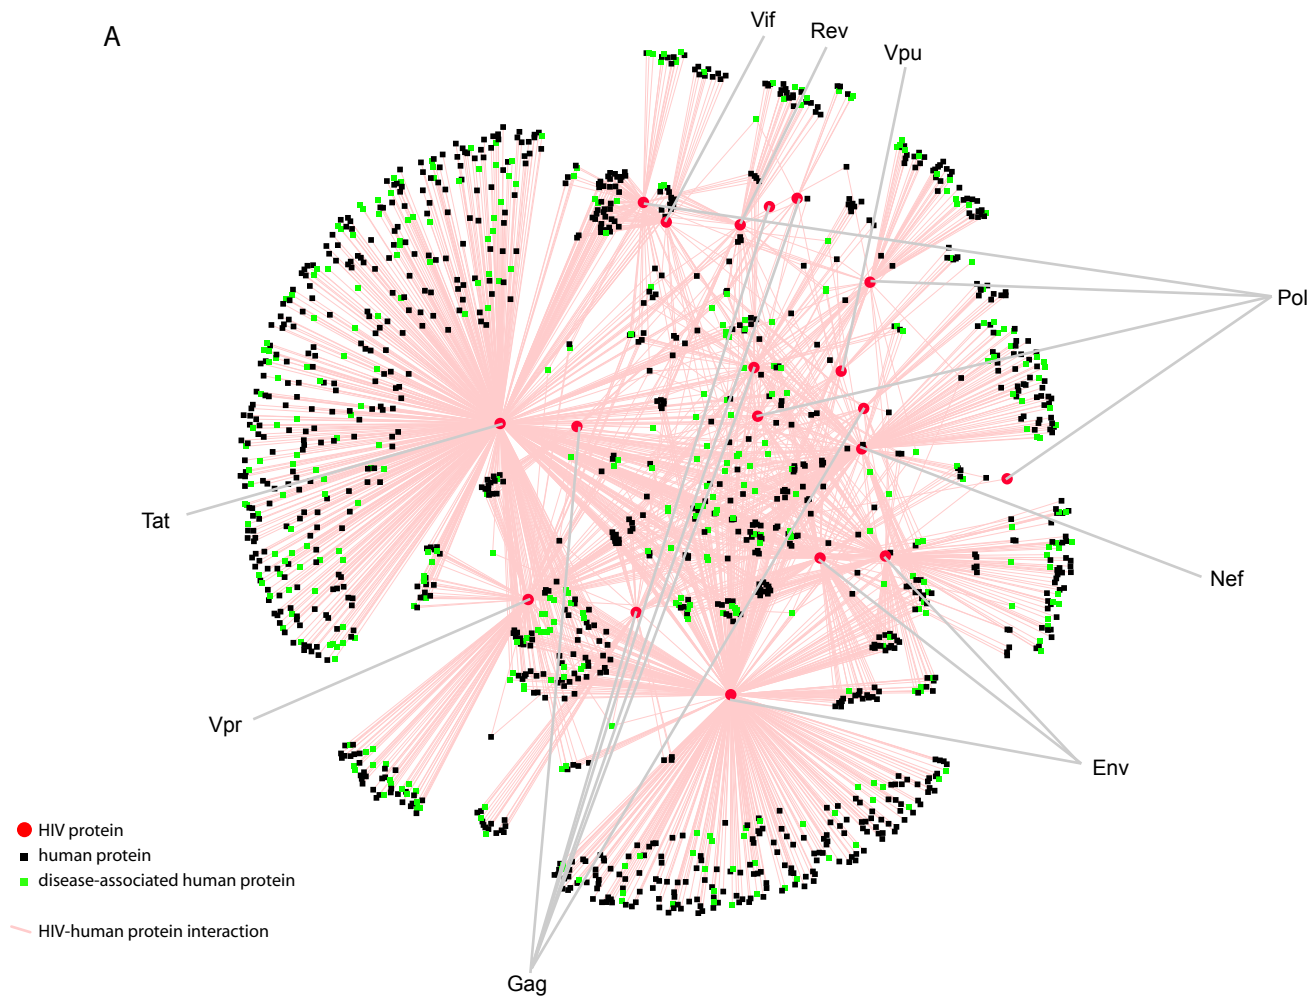

B

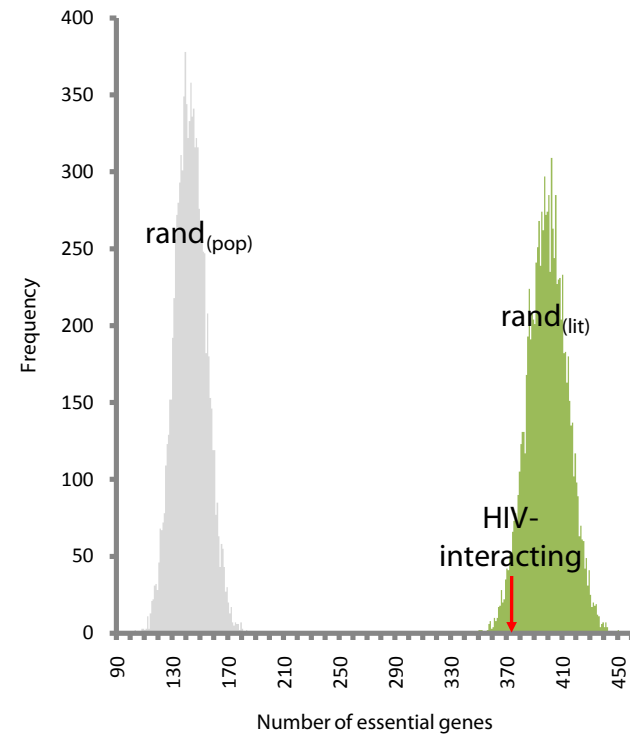

Supplement: 12918_2009_469_MOESM5_ESM.pdf [file 12918_2009_469_MOESM5_ESM.pdf]
